# Supplementary material
Source: MDPI journal article supplement (https://www.mdpi.com/2073-4344/9/7/588)
Supplement: s1 [file s1]

# Supplementary Materials: Monodispersed Pt<sub>3</sub>Ni Nanoparticles as a Highly Efficient Electrocatalyst for PEMFCs

Delong Yang, Jun Gu\*, Xiaomeng Liu, Haitong He, Meiyu Wang, Peng Wang, Yong Zhu, Qi Fan\* and Runsheng Huang\*

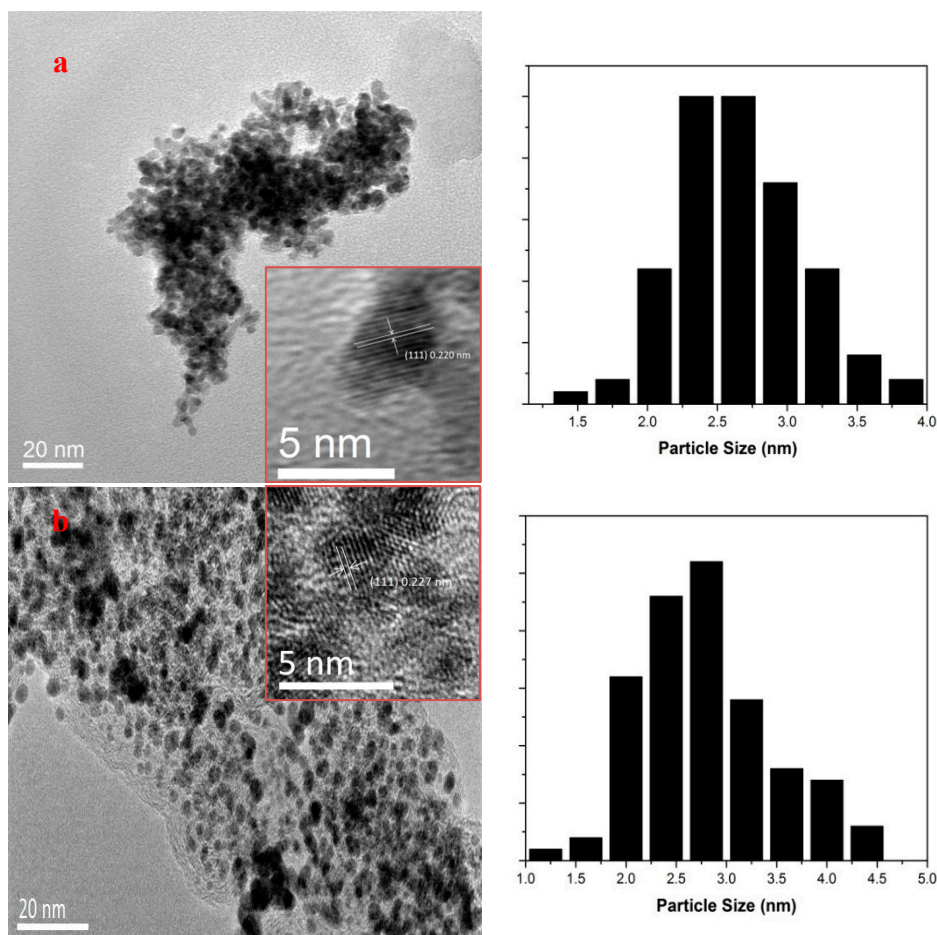

Figure S1. TEM images and size histogram of (a) NC-Pt<sub>3</sub>Ni nanoparticles and (b) commercial Pt/C.

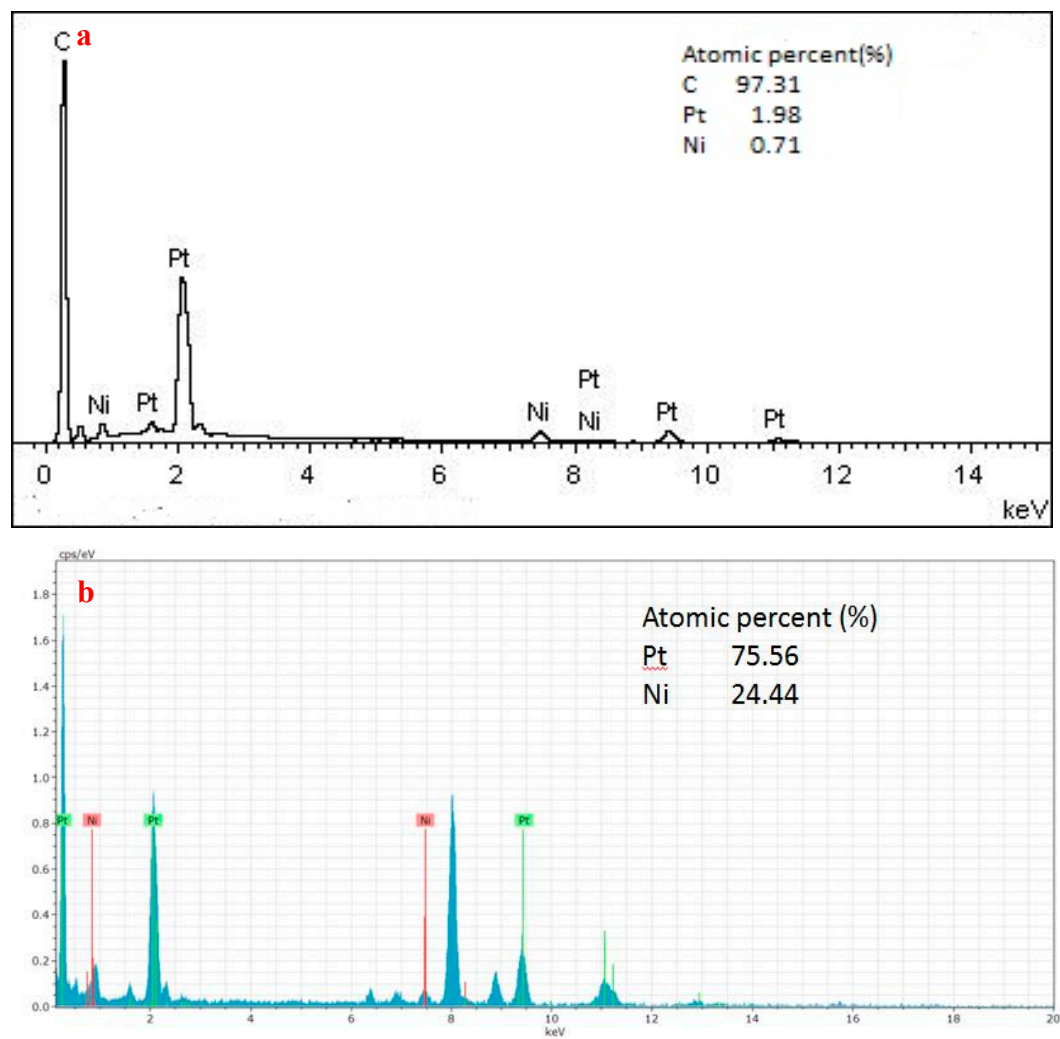

Figure S2. EDX spectra of (a) Pt<sub>3</sub>Ni/EC-600 and (b) NC-Pt<sub>3</sub>Ni.

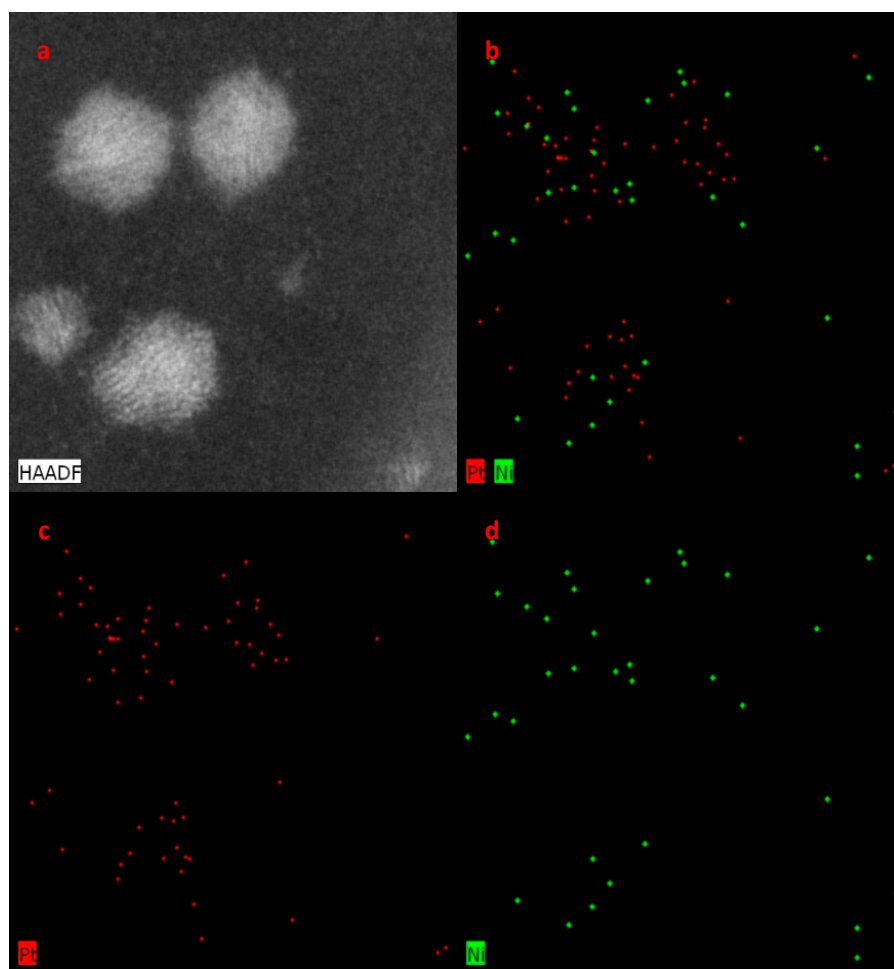

**Figure S3.** STEM-EDX elemental mapping of Pt/Ni/EC-600: (a) HAADF-STEM image, (b) overall mapping of Pt and Ni, (c) Pt mapping in red and (d) the Ni mapping in green are shown.

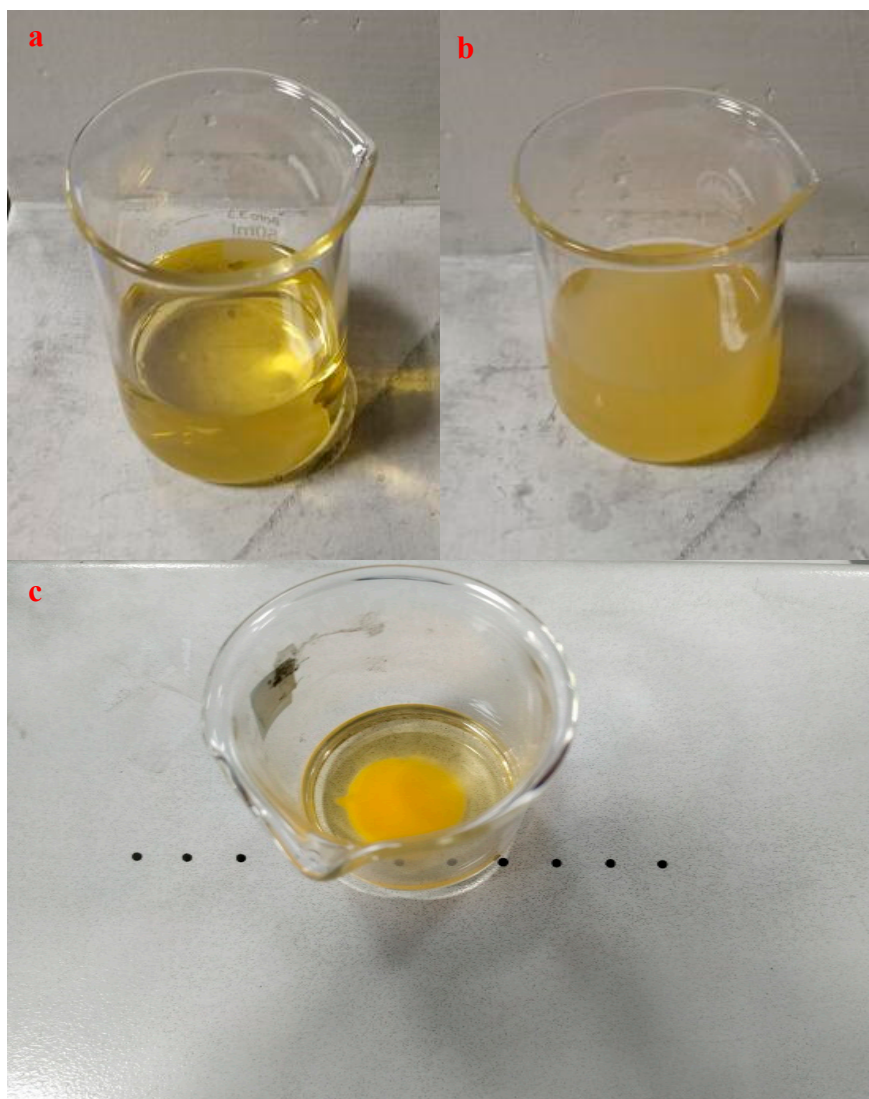

**Figure S4.** Optical images of precursor solution **(a)** before the addition of TEA **(b)** after the addition of TEA **(c)** 10 min after the addition of TEA without sonication.

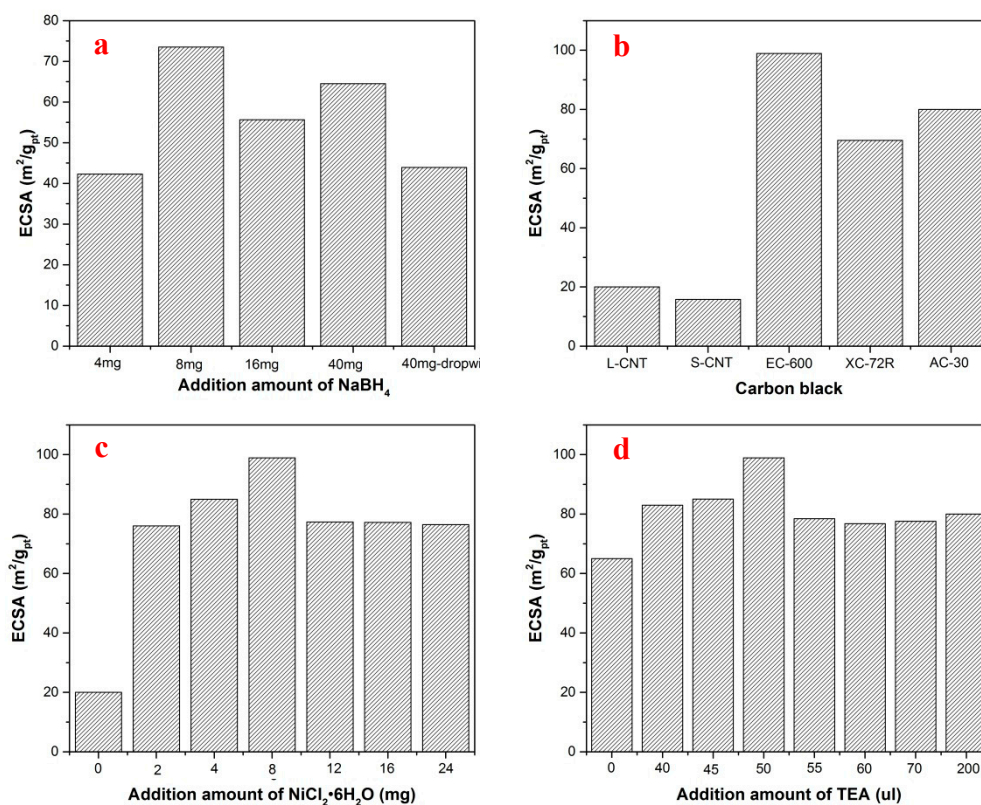

**Figure S5.** Changes of ECSA under various synthesis conditions. **(a)** controlling the addition rate and addition amount of NaBH<sub>4</sub>. **(b)** using different carbon black as catalyst support. **(c)** controlling the addition amount of NiCl<sub>2</sub>·6H<sub>2</sub>O. **(d)** controlling the addition amount of TEA.

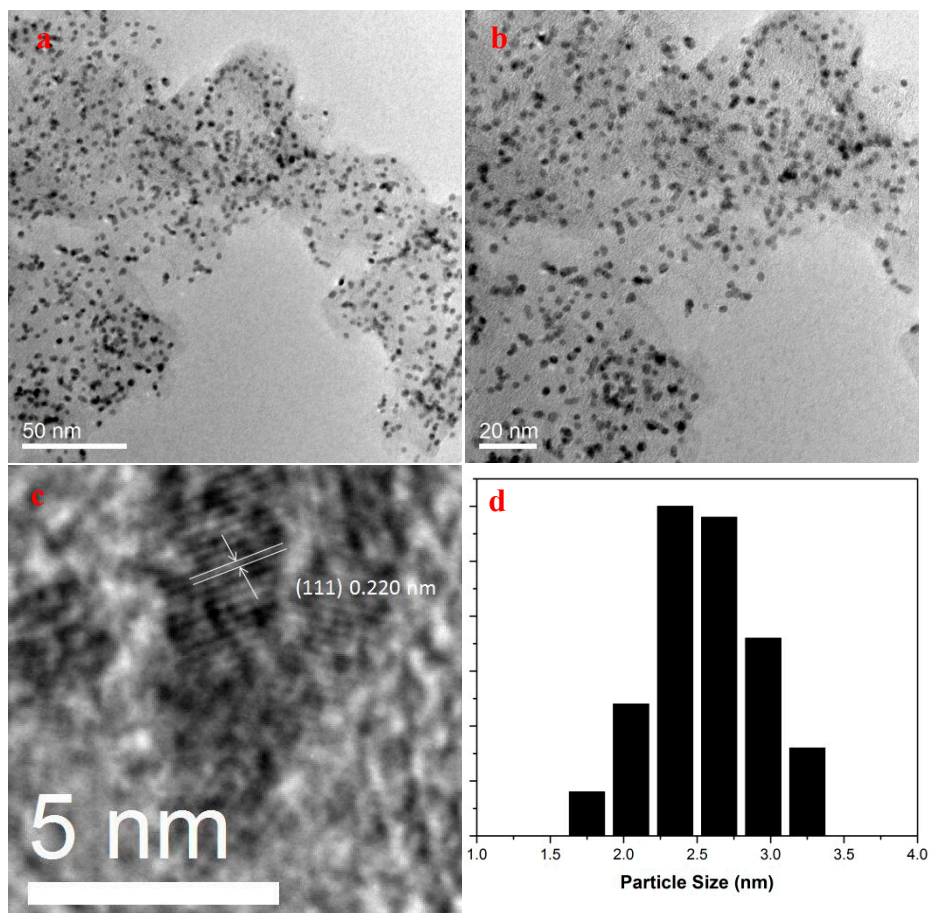

**Figure S6.** (a-b) TEM images, (c) HRTEM images and (d) size histogram of Pt<sub>3</sub>Ni/EC-600 after initial electro-cycling

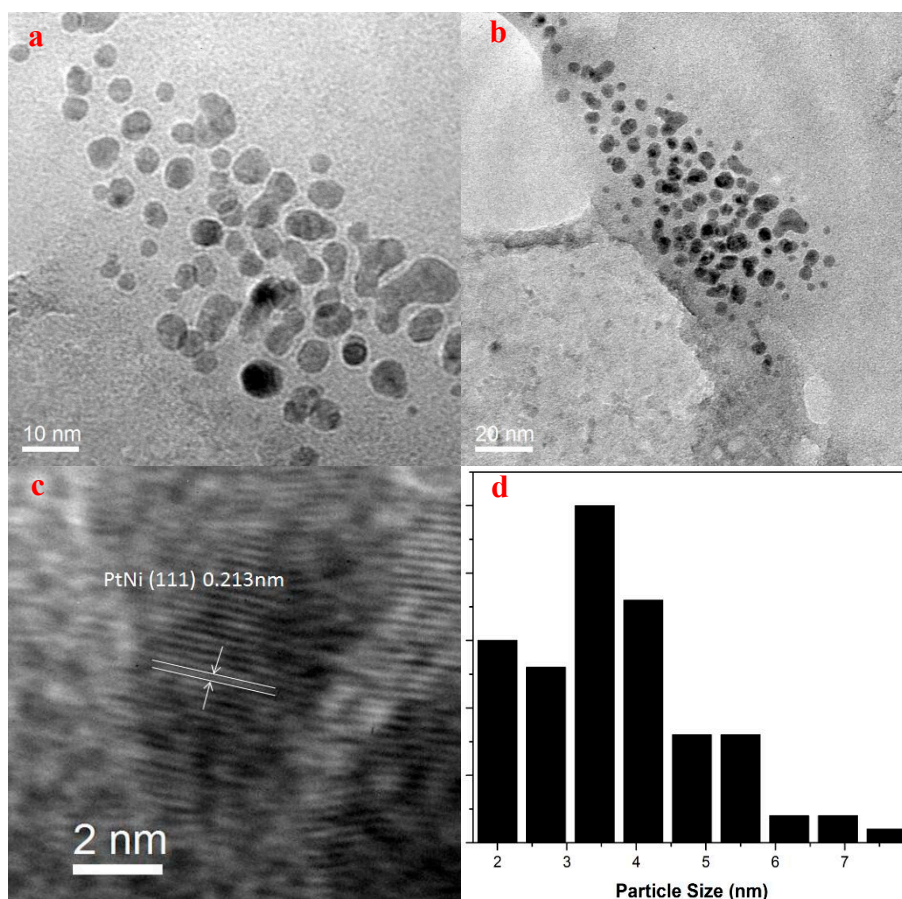

**Figure S7.** (a-b) TEM images, (c) HRTEM images and (d) size histogram of Pt<sub>3</sub>Ni/EC-600 after accelerated durability tests

**Table S1.** Comparison of optimal as-prepared catalysts and state-of-the-art PtNi nanoparticles.

| PtNi catalysts                     | Particle size (nm) | Dispersion and Size distribution | ECSA (m <sup>2</sup> g <sub>Pt</sub> <sup>-1</sup> ) | MA(mA mg <sup>-1</sup> <sub>Pt</sub> ) @RDE |
|------------------------------------|--------------------|----------------------------------|------------------------------------------------------|---------------------------------------------|
| Pt <sub>3</sub> Ni/EC-600          | 2.8±0.4            | Good                             | 98.9                                                 | 0.14@0.9V                                   |
| Pt <sub>3</sub> Ni <sup>1</sup>    | 2.4~4              | Bad                              | ----                                                 | ----                                        |
| PtNi/C <sup>2</sup>                | 3.87               | Bad                              | 60.9                                                 | ~0@0.9V                                     |
| PtNi@C <sup>3</sup>                | 5                  | Bad                              | 55.4                                                 | 0.84@0.9V                                   |
| PtNi@MoS <sub>2</sub> <sup>4</sup> | 6.26±1.35          | Normal                           | ----                                                 | ----                                        |
| PtNi@CNS-60 <sup>5</sup>           | 3                  | Normal                           | ----                                                 | ----                                        |
| PtNi core-shell <sup>6</sup>       | 6±1.7              | Bad                              | ----                                                 | ----                                        |

<sup>1</sup>Varshney, M.; Sharma, A.; Shin, H.; Lee, H. H.; Jeon, T.; Lee, B.; Chae, K.; Won, S. O., Influence of Ni doping on PtNi nanoparticles: Synthesis, electronic/atomic structure and photocatalyst investigations. *JOURNAL OF PHYSICS AND CHEMISTRY OF SOLIDS* **2017**, *110*, 187-194.

<sup>2</sup>Zhang, P.; Tao, A.; Tan, Y.; Jin, J.; Zhang, H., Performance and Durability of Pt-Ni Catalysts Supported on Polypyrrole-Carbon for Fuel Cells. *Journal of Electronic Materials* **2019**, *48*, 2780-2787.

<sup>3</sup>Li, W.; Zou, S., PtNi Nanoparticles Encapsulated in Few Carbon Layers as High-Performance Catalysts for Oxygen Reduction Reaction. *ACS Applied Energy Materials* **2019**, *2*, 2769-2778.

<sup>4</sup>Ma, L.; Zhang, Q.; Wu, C.; Zhang, Y.; Zeng, L., PtNi bimetallic nanoparticles loaded MoS<sub>2</sub> nanosheets: Preparation and electrochemical sensing application for the detection of dopamine and uric acid. *Analytica Chimica Acta* **2019**, *1055*, 17-25.

<sup>5</sup>Li, J.; Liu, L.; Ai, Y.; Hu, Z.; Xie, L.; Bao, H.; Wu, J.; Tian, H.; Guo, R.; Ren, S.; Xu, W.; Sun, H.; Zhang, G.; Liang, Q., Facile and Large-Scale Fabrication of Sub-3 nm PtNi Nanoparticles Supported on Porous Carbon Sheet: A Bifunctional Material for the Hydrogen Evolution Reaction and Hydrogenation. *Chemistry – A European Journal* **2019**, *25*, 7191-7200.

<sup>6</sup>Glüsen, A.; Dionigi, F.; Paciok, P.; Heggen, M.; Müller, M.; Gan, L.; Strasser, P.; Dunin-Borkowski, R. E.; Stolten, D., Dealloyed PtNi-Core-Shell Nanocatalysts Enable Significant Lowering of Pt Electrode Content in Direct Methanol Fuel Cells. *ACS Catalysis* **2019**, *9*, 3764-3772.
